# Supplementary material for: Regulating π-type interactions between O 2p and TM t2g orbitals via Ti doping and surface dielectric coatings for Li-rich cathodes
Source: Royal Society of Chemistry journal article supplement (doi:10.1039/d4qi02773f), 2024-12-24
Supplement: d4qi02773f1.pdf [file d4qi02773f1.pdf]

## **Regulating $\pi$ -Type Interactions between O 2p and TM t2g Orbitals via Ti Doping and Surface Dielectric Coatings for Li-Rich Cathode**

Guimei Han <sup>a,1</sup>, Di Zhang <sup>b,1</sup>, Da Zhang <sup>b</sup>, Chungue Dang <sup>a,\*</sup>, Jianling Li<sup>b,\*</sup>

1: These authors contributed equally to this work and should be considered co-first authors

a State Environmental Protection Key Laboratory of Eco-industry, Chinese Research Academy of Environmental Sciences, Beijing, 100012, China

b State Key Laboratory of Advanced Metallurgy, University of Science and Technology Beijing, Beijing 100083, China

\*Corresponding author, E-mail address: [dangcg@craes.org.cn](mailto:dangcg@craes.org.cn), [lijianling@ustb.edu.cn](mailto:lijianling@ustb.edu.cn).

( These authors contributed equally to this work)

## **1. EXPERIMENTAL SECTION**

### **1.1 Synthesis of Materials**

The precursor of LLOs( $\text{Li}_{1.2}\text{Mn}_{0.54}\text{Ni}_{0.13}\text{Co}_{0.13}\text{O}_2$ ) was first prepared by co-precipitation. The synthesis conditions were nitrogen atmosphere, PH 12, and reaction temperature of 60 °C. The prepared precursor was mixed with  $\text{LiOH}\cdot\text{H}_2\text{O}$ (5% excess) and then held at 450 °C for 5 h and 900 °C for 18 h to obtain LLOs. To obtain the modified materials, niobium ethanolate and tetrabutyl titanate were dissolved in 50 ml of ethanol at a molar ratio of 2:1 and stirred for 1 h. Subsequently, 1 g of LLOs was added and evaporated with stirring at 80 °C in an oil bath. After the solution was evaporated, the powder was scooped out with a medicine spoon and put into a muffle furnace at 700 °C for 6 h. The modified materials were obtained by cooling the furnace to room temperature. The mass fractions of the coating layer were 1 wt%, 2 wt%, and 4 wt%, which were recorded as 1% TN, 2% TN, and 4% TN, respectively.

### **1.2 Material characterizations**

The crystal structure and physical phases were determined by X-ray diffraction (XRD) (PANalytical, PW 3040-X'Pert Pro). Scanning electron microscopy (Zeiss SUPRATM55) and transmission electron microscopy (JEOL-JEM 2100) were used to visualize particle morphology and fine structure. Elemental valence states were detected by X-ray photoelectron spectroscopy (XPS) (Thermo Scientific ESCALAB 250Xi).

### **1.3 Electrochemical Measurements**

Electrode sheets were prepared by a coating method. The mass ratio of cathode

material, conductive agent (Super P) and PVDF (dissolved in NMP as a binder) was 75:15:10. The half-cells were assembled in a glove box with an electrolyte composition of 1M LiPF<sub>6</sub>/EC: DMC (1:1). Constant-current charge/discharge tests were performed on a blue power tester (LANHE CT2001A) with a voltage range of 2.0-4.7 V. The current density is denoted by C, and 1C = 250 mA g<sup>-1</sup>. Electrochemical alternating current impedance (EIS) tests were performed on a VMP2 electrochemical workstation (Princeton Applied Research VersaSTAT3). The frequency range was 100 kHz to 10 mHz with a voltage perturbation of 5 mV. The constant current intermittent titration technique (GITT) measurements were performed by charging/discharging at a constant current of 0.1C for 10 min, followed by a 40 min rest in the open circuit.

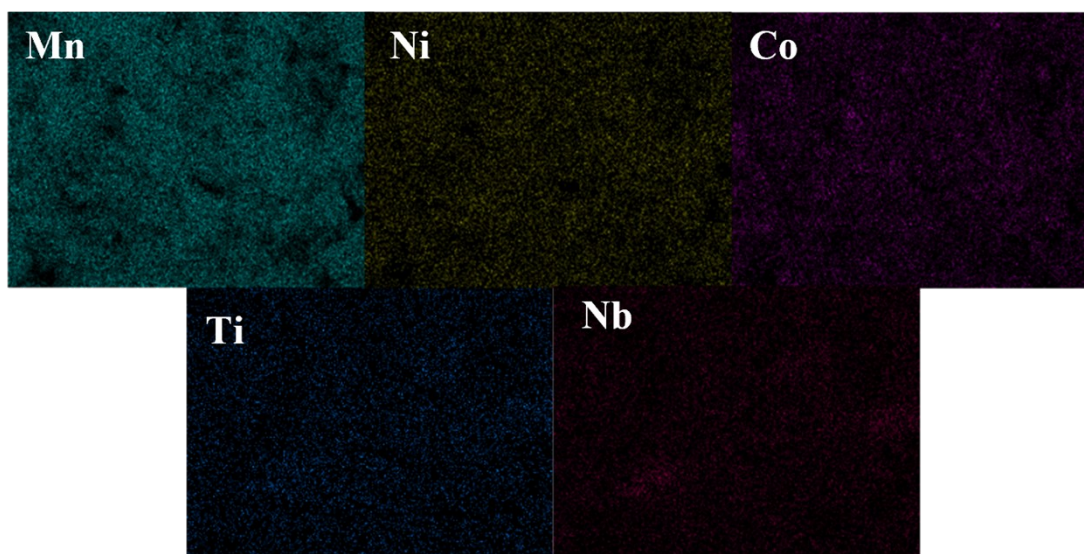

**Fig. S1.** EDS energy spectra of 2% TN.

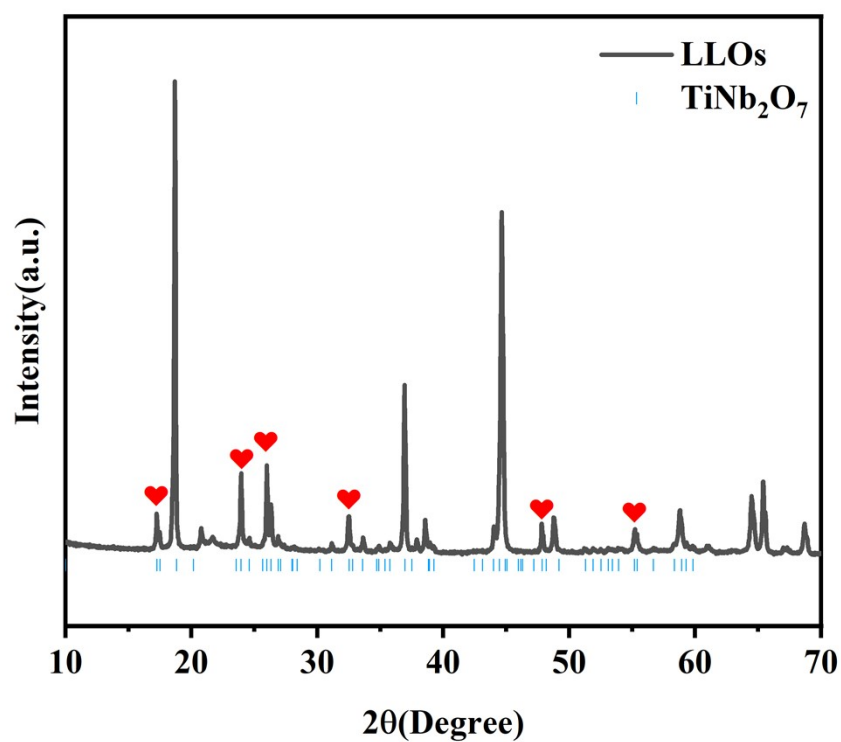

**Fig.S2.** XRD pattern of LLOs coated with 20 wt% TiNb<sub>2</sub>O<sub>7</sub>.

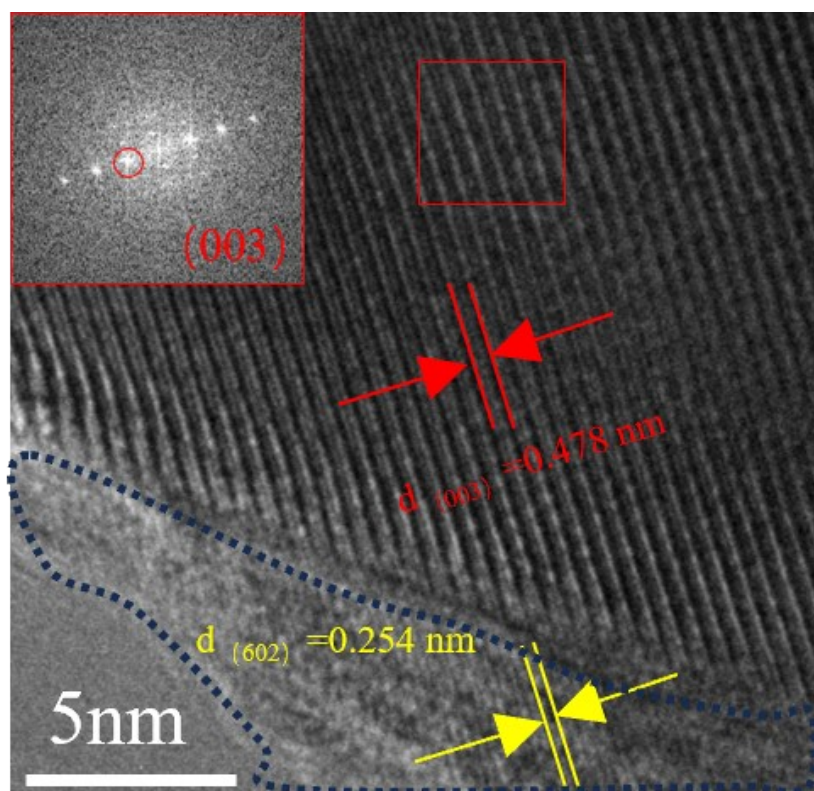

**Fig.S3.** Localized TEM of 2% TN samples.

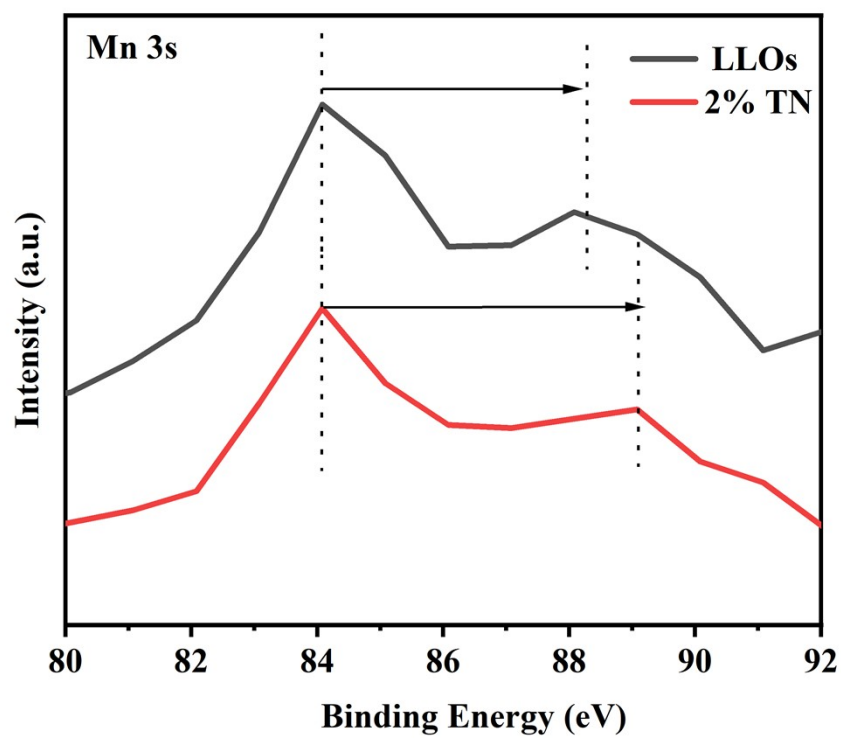

**Fig. S4.** Mn 3s orbital XPS results for LLOs and 2% TN.

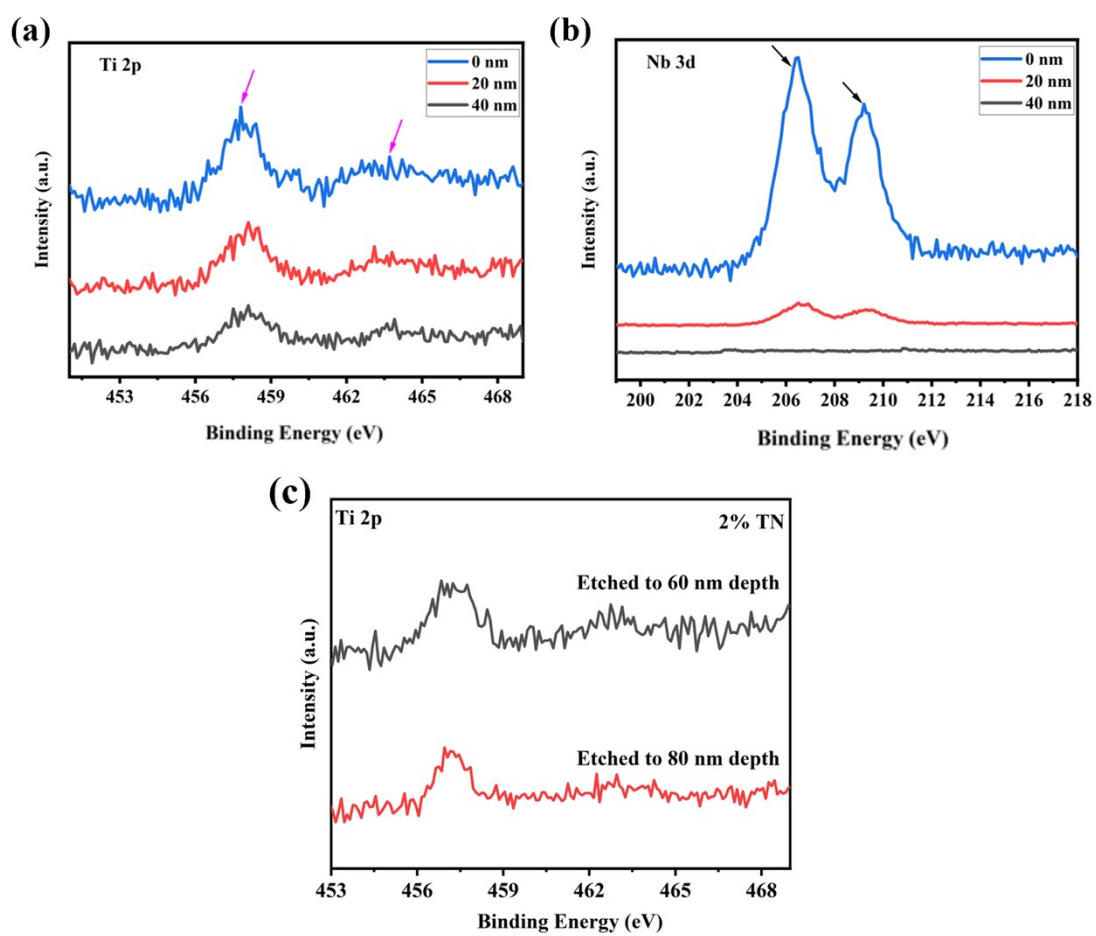

**Fig. S5.** Results of xps etching of Ti/Nb elements at different depths.



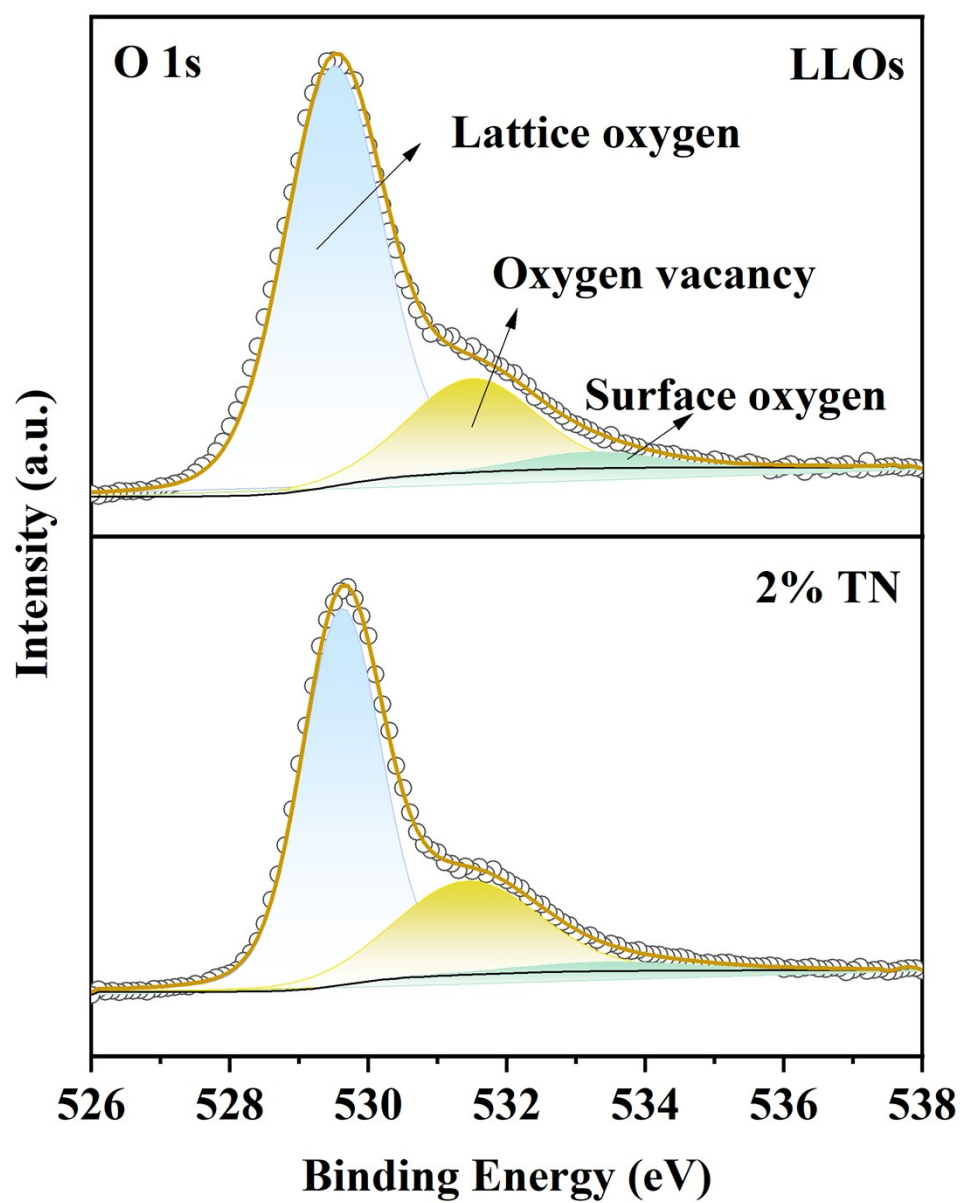

**Fig. S6.** O1S fitting results for LLOs and 2% TN samples

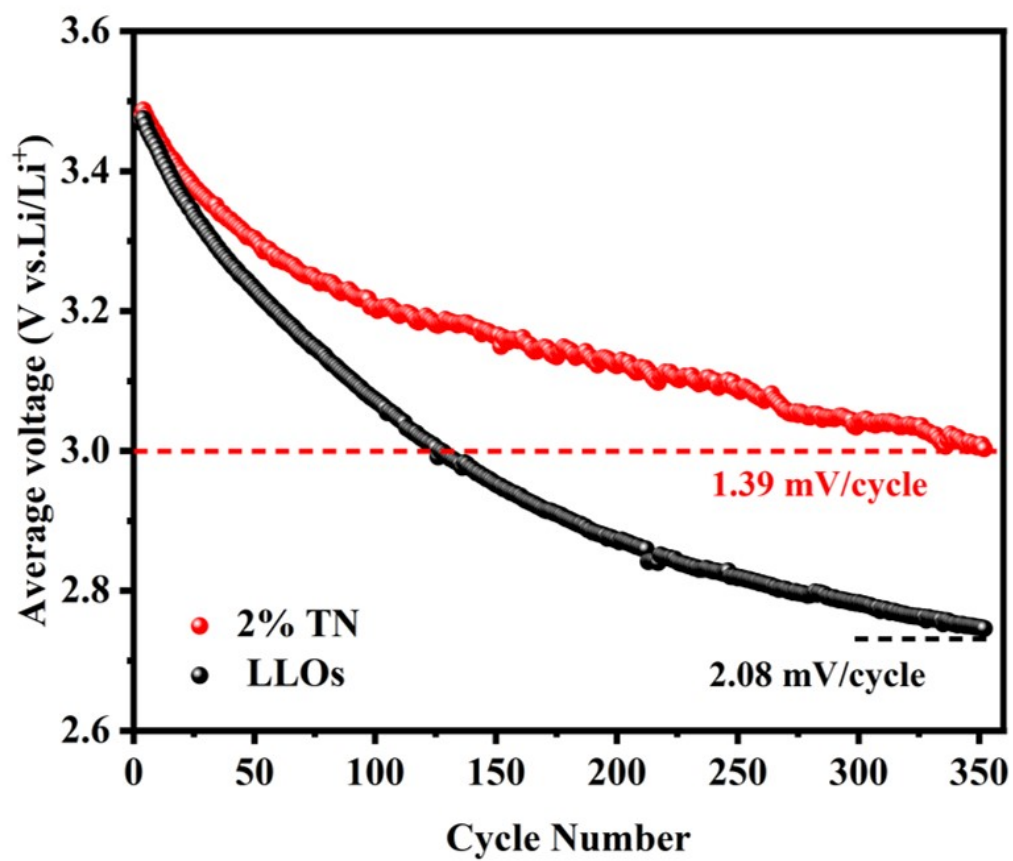

Fig. S7. Voltage decay curves for LLOs and 2% TN samples undergoing 350 cycles

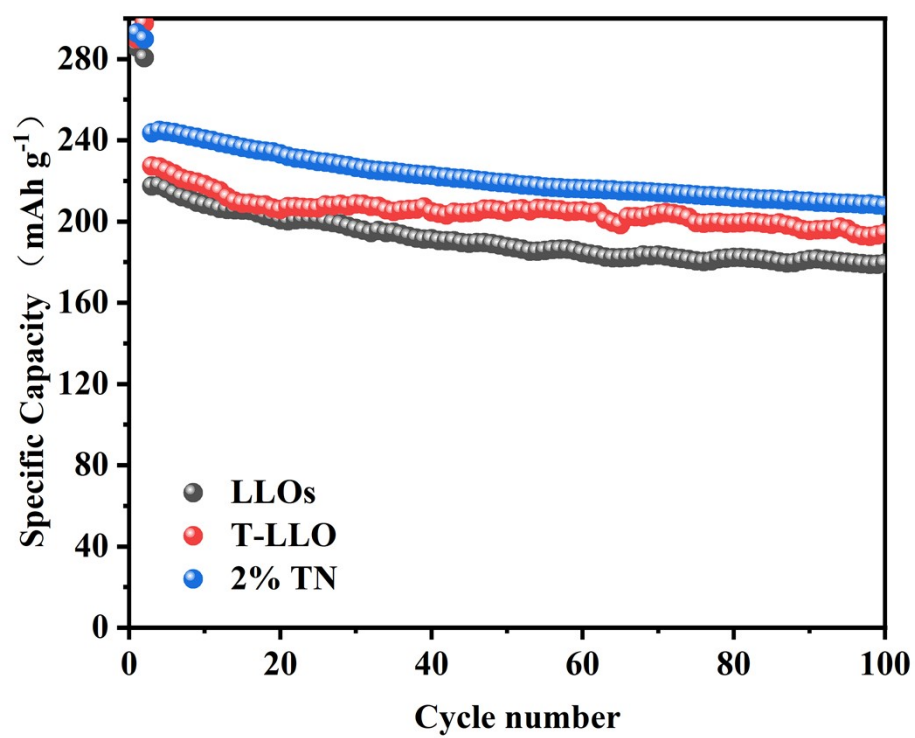

Fig. S8. Cycling performance of individual samples of 1C within 2-4.7 V.

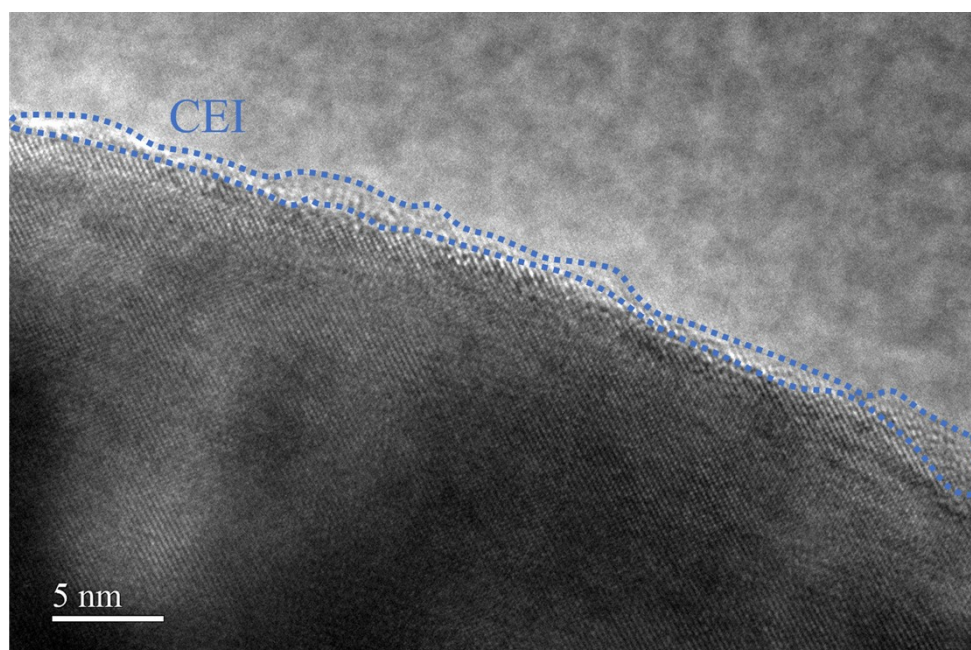

**Fig. S9.** TEM image of T-LLO after 100 cycles.

**Table S1** Data of electrochemical properties of materials.

| Sample | Charge specific capacity<br>(mAh g <sup>-1</sup> ) | Discharge specific<br>capacity (mAh g <sup>-1</sup> ) | Coulomb efficiency<br>(%) |
|--------|----------------------------------------------------|-------------------------------------------------------|---------------------------|
| LLOs   | 340.4                                              | 282.7                                                 | 83.05                     |
| 1% TN  | 330.7                                              | 289.5                                                 | 87.54                     |
| 2% TN  | 330.4                                              | 289.8                                                 | 87.71                     |
| 4% TN  | 337.2                                              | 280.7                                                 | 83.26                     |

**Table S2** Impedance fits for all samples before and after cycling.

|       | Sample                   | LLOs  | 2% TN |
|-------|--------------------------|-------|-------|
| 1st   | $R_{\text{ct}} (\Omega)$ | 119.6 | 98.4  |
| 500th | $R_{\text{sf}} (\Omega)$ | 171.8 | 91.87 |
|       | $R_{\text{ct}} (\Omega)$ | 1116  | 221   |
